# Supplementary material for: Chemical and thermal properties of VO2 mechanochemically derived from V2O5 by co-milling with paraffin wax
Source: Royal Society of Chemistry journal article supplement (doi:10.1039/c8ra02159g), 2018-01-01
Supplement: c8ra02159g1.pdf [file c8ra02159g1.pdf]

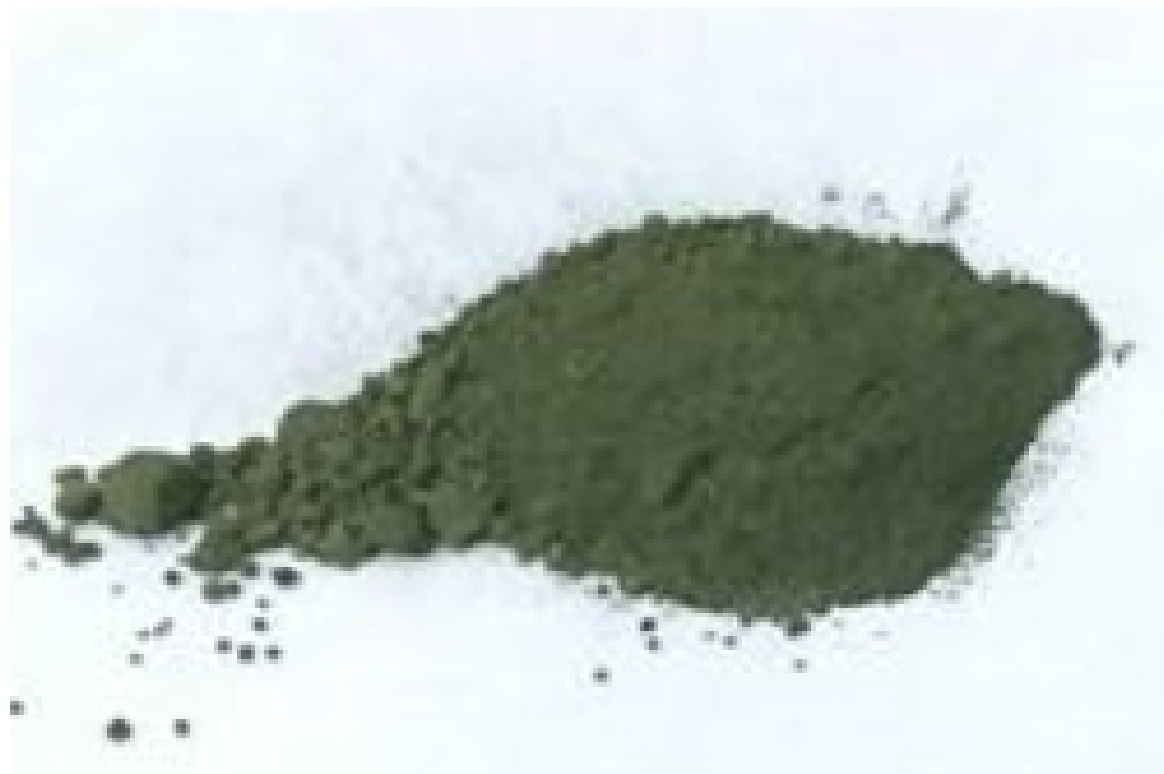

Fig. S1 Sample color of the sample obtained after milling at MRVP 30:1 for 3h.

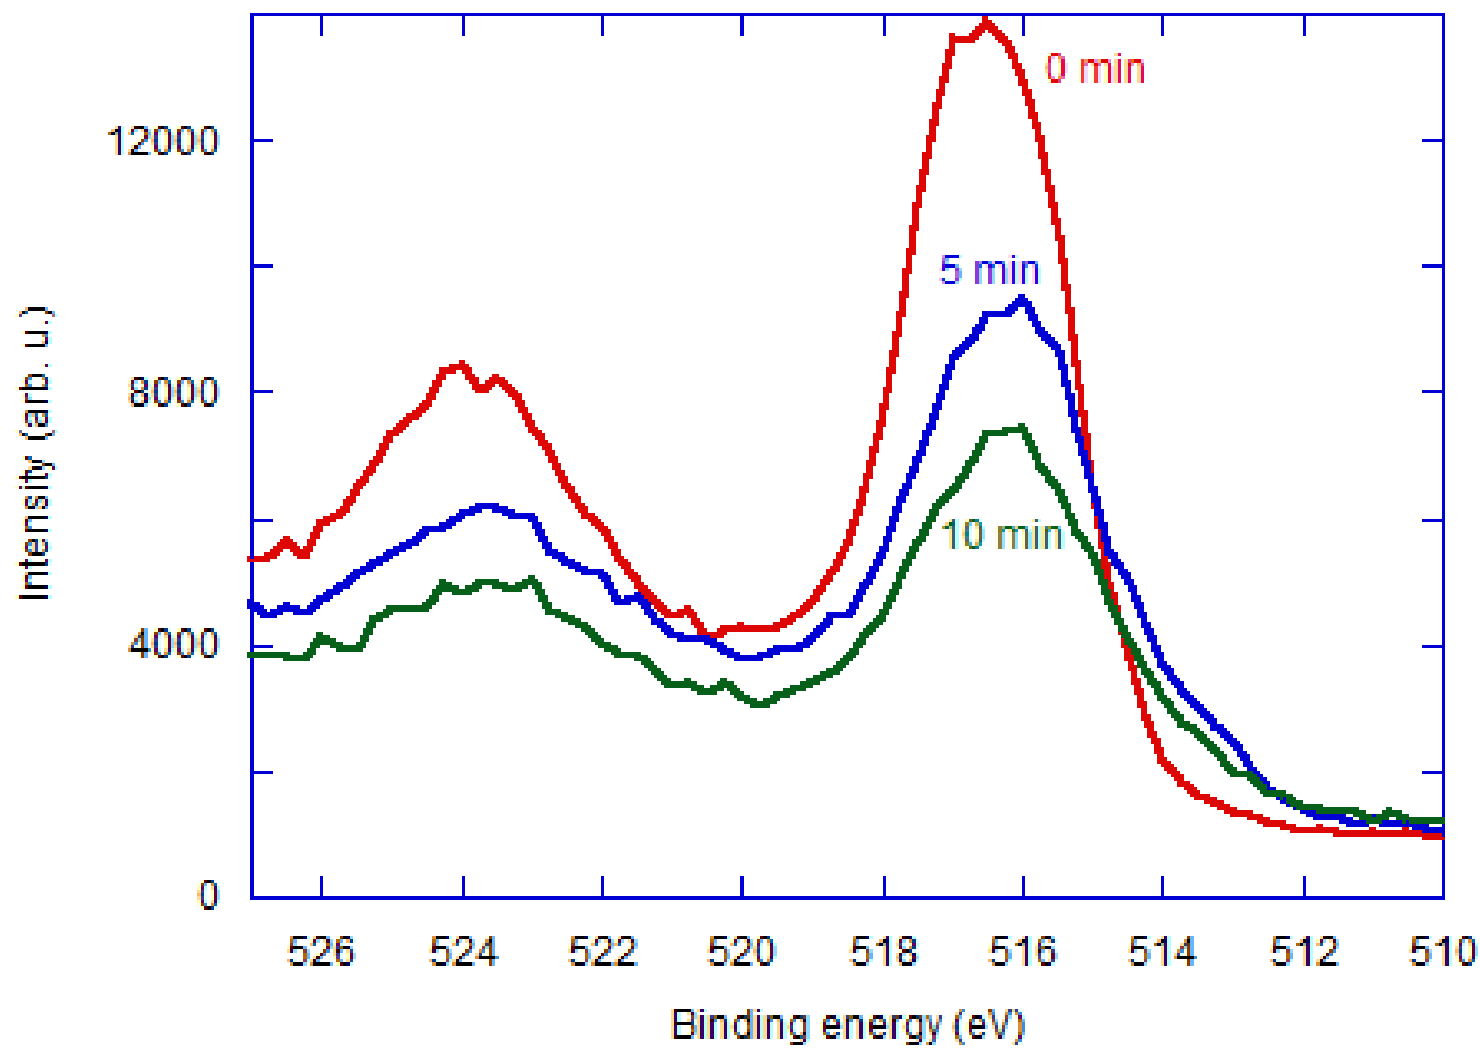

Fig. S2 V2p XPS profiles of 30:1 with varying etching time

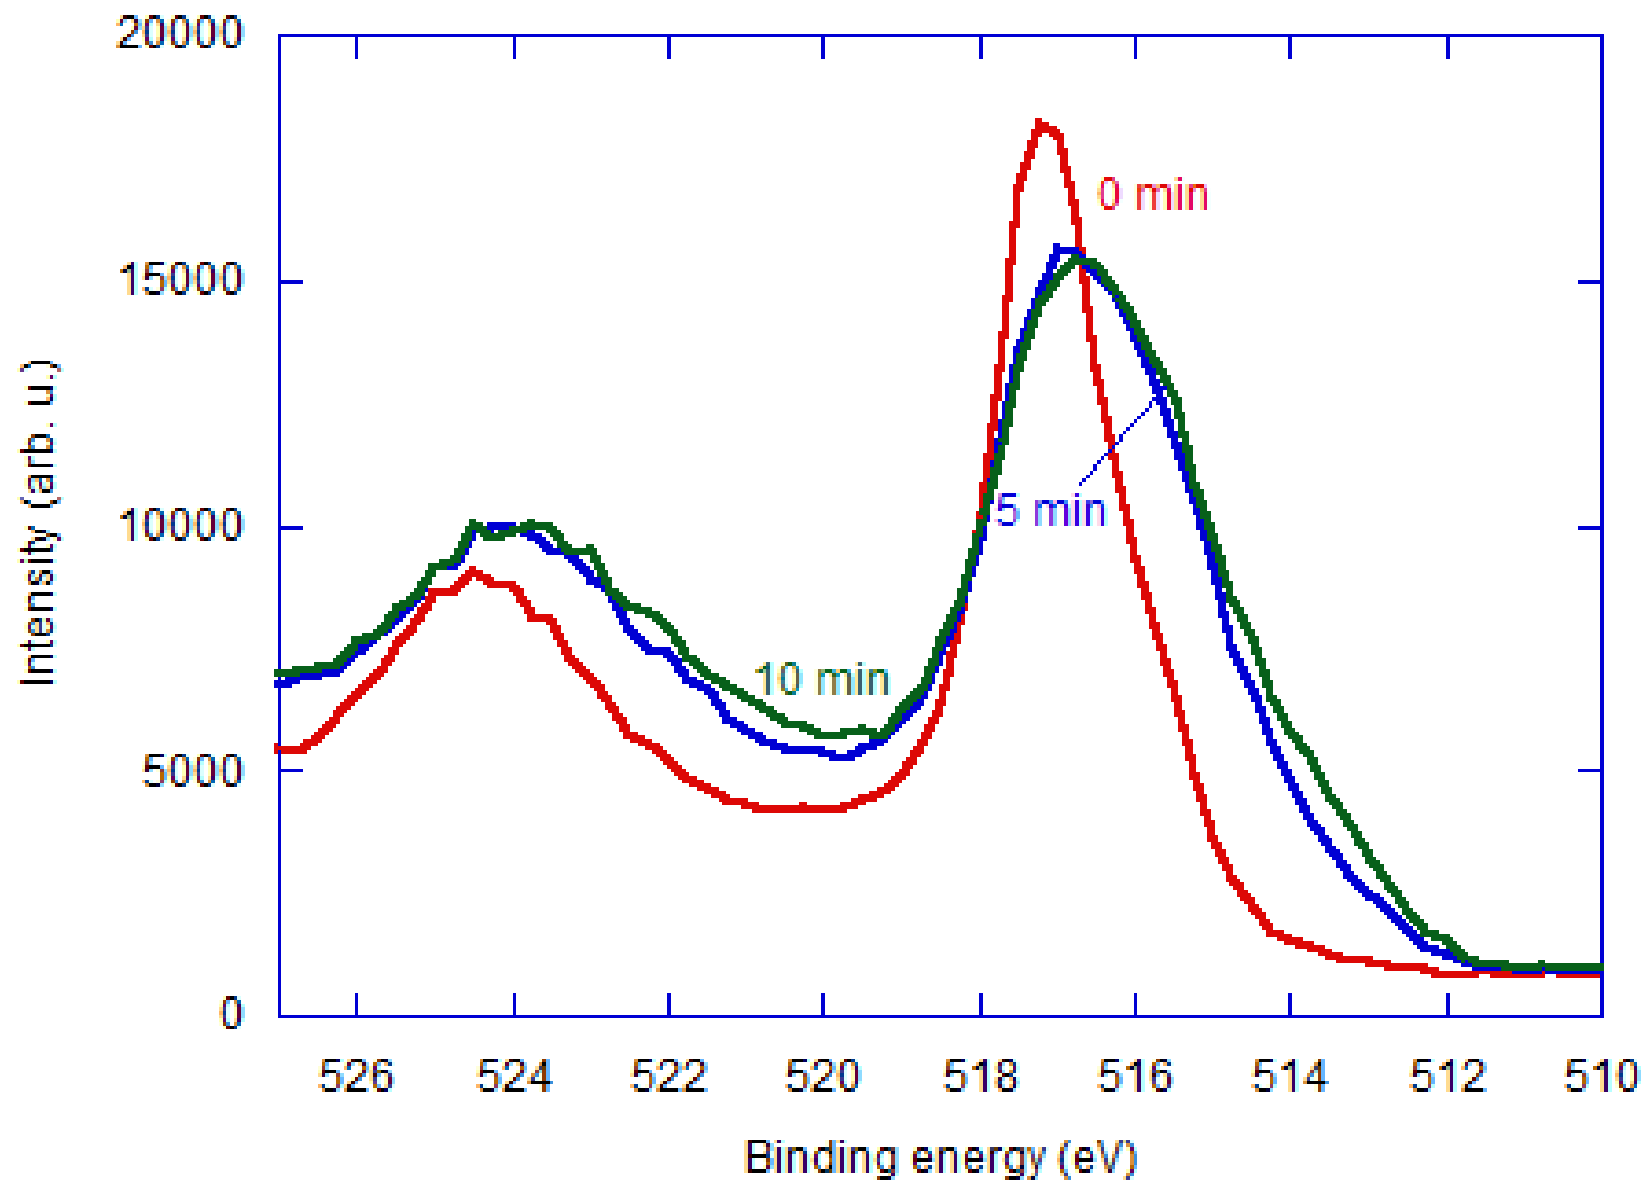

Fig. S3 V2p XPS profiles of VO2 with varying etching time

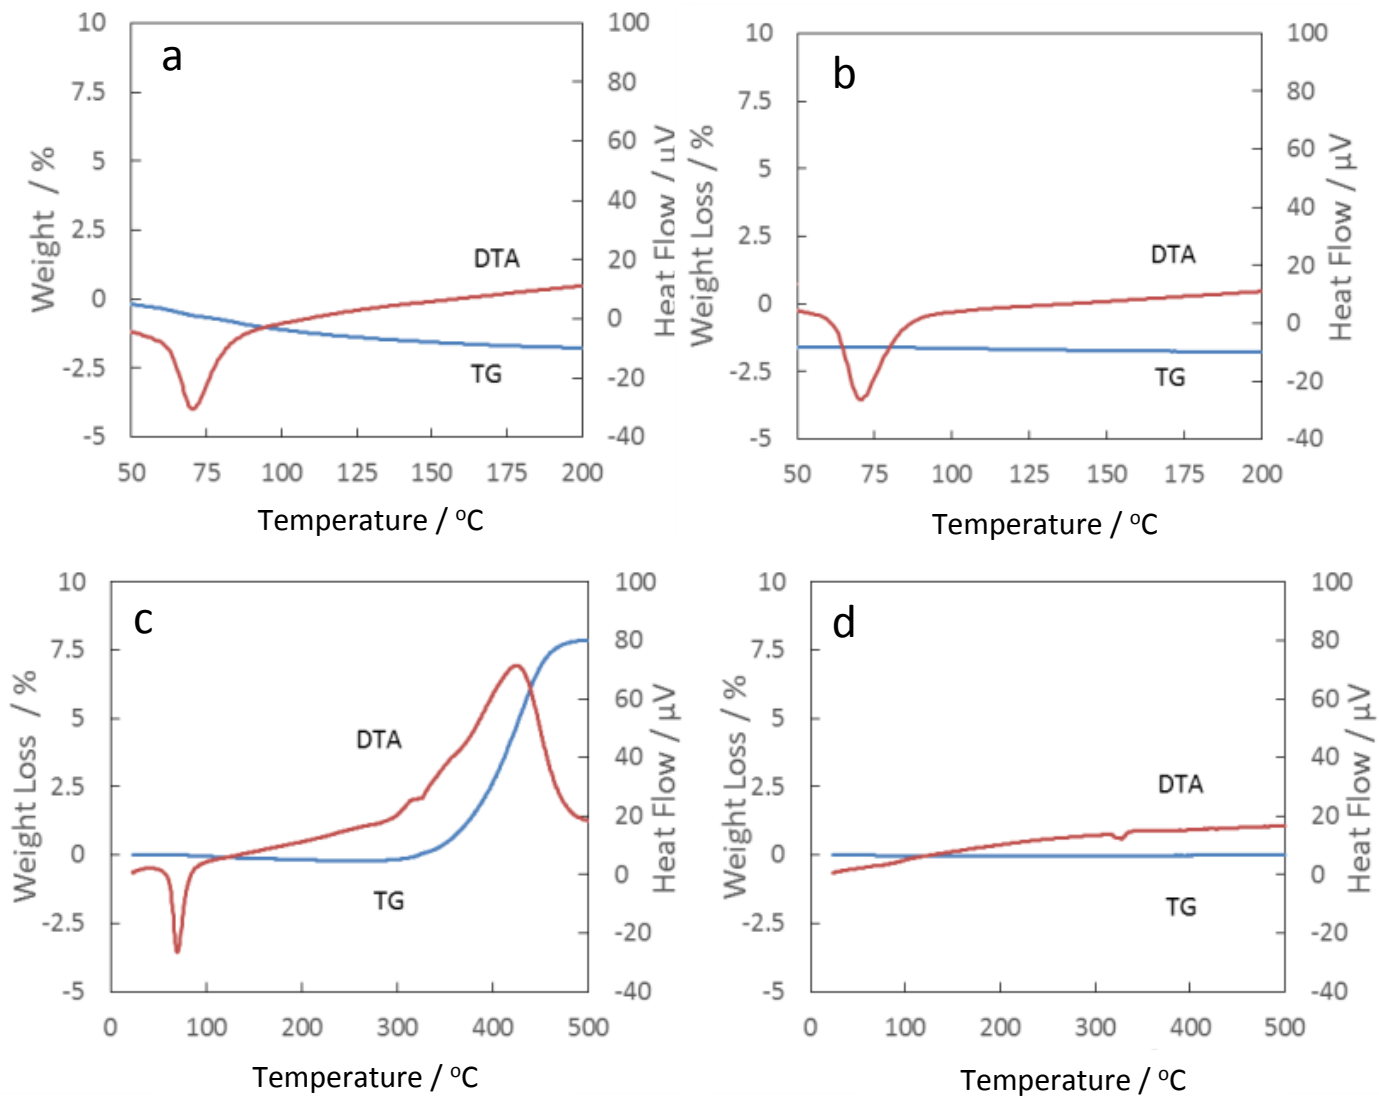

Fig. S4 TG-DTA profiles of the first and second cycles of commercial VO<sub>2</sub> for the temperature spans, 50 °C~200 °C (a and b) and 50 °C~500 °C (c and d)..

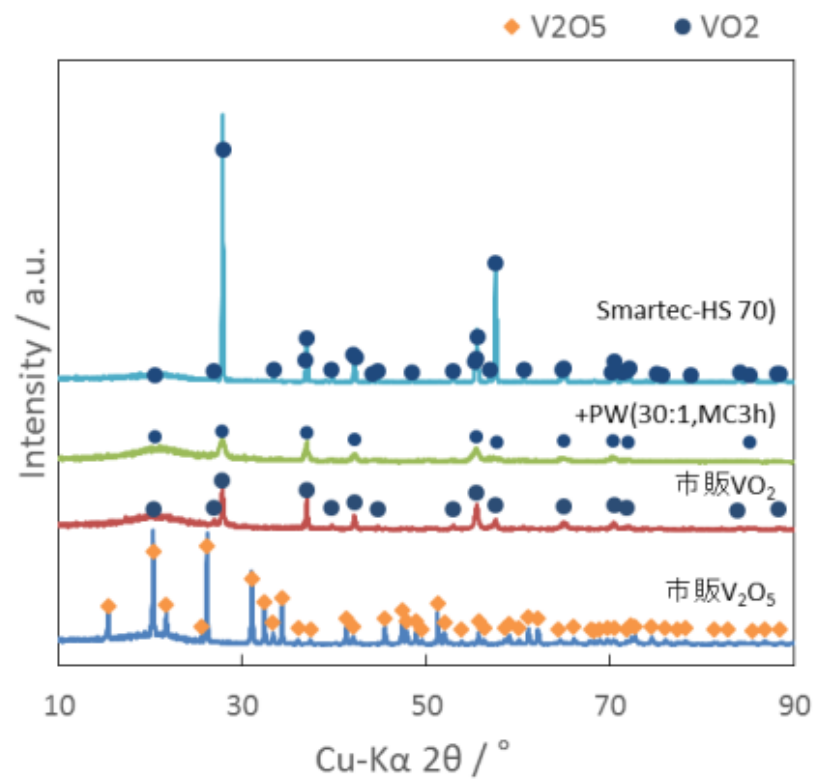

Fig. S5 X-ray diffractogram of commercial heat storage material, Smartec HS 70 compared with other  $\text{VO}_2$  and  $\text{V}_2\text{O}_5$  samples

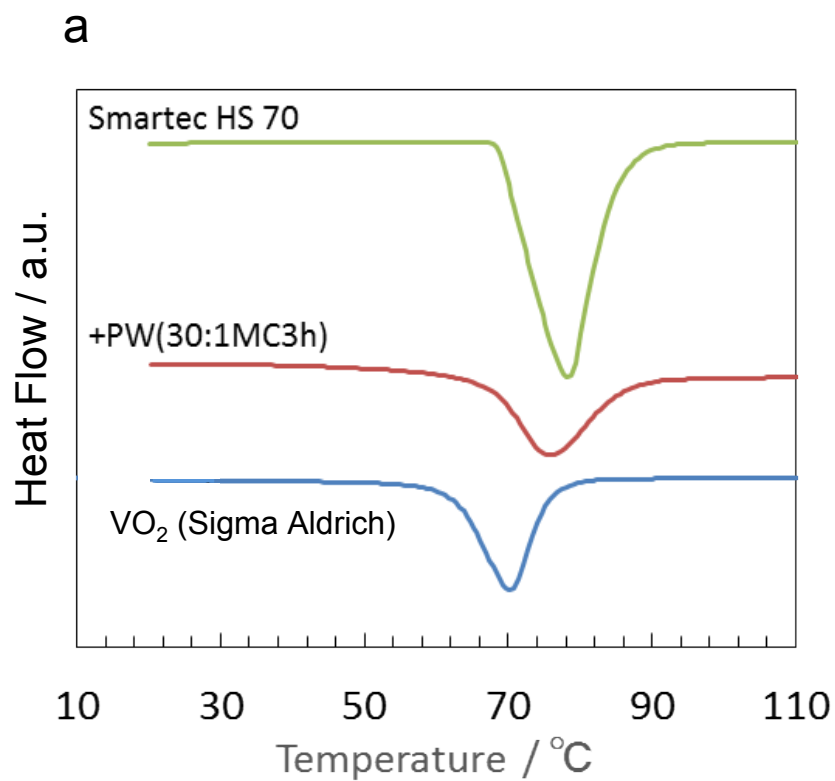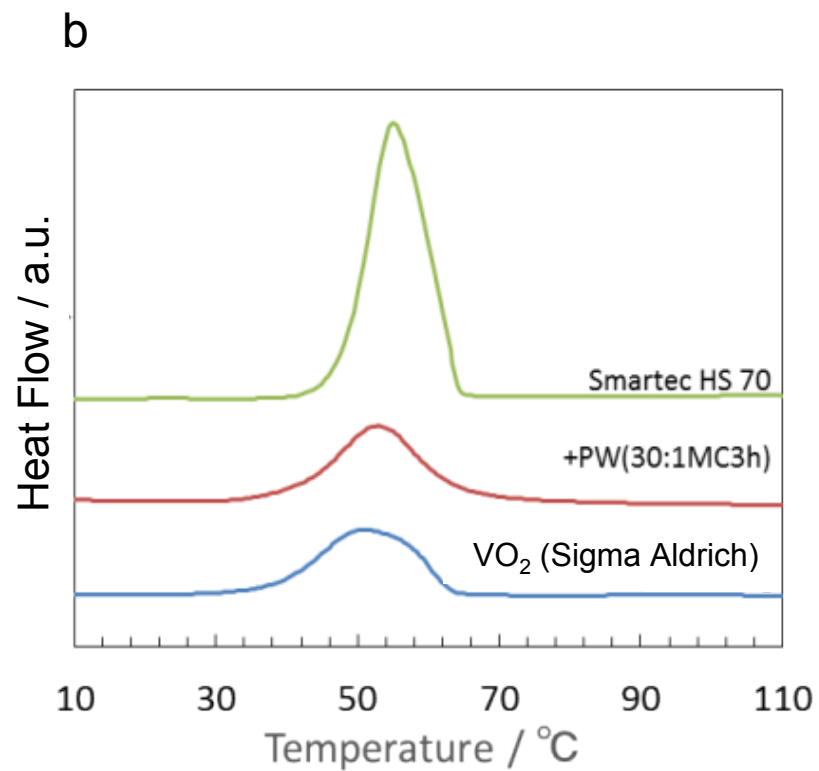

Fig. S6 DSC profiles of the milling time, 3h, with varying V<sub>2</sub>O<sub>5</sub>:HC ratio 30:1, compared with commercial VO<sub>2</sub> and heat storage material Smartec HS 70
